# Supplementary material for: Good's buffer ionic liquid tunes the phase behavior of an anionic surfactant SDBS-stabilized n-octane–water microemulsion and the stability of the solubilized horseradish peroxidase
Source: Royal Society of Chemistry journal article supplement (doi:10.1039/d1sm00783a), 2021-01-01
Supplement: d1sm00783a1.pdf [file d1sm00783a1.pdf]

## Electronic Supplementary Information for

Good's buffer ionic liquid tunes the phase behavior of anionic surfactant SDBS-stabilized *n*-octane-water microemulsion and the stability of the solubilized horseradish peroxidase

Xiaonan Li, Xirong Huang\*

*Key Laboratory of Colloid and Interface Chemistry of the Education Ministry of China, Shandong University, Jinan 250100, China.*

\* Corresponding author

E-mail address: xrhuang@sdu.edu.cn (X. Huang)

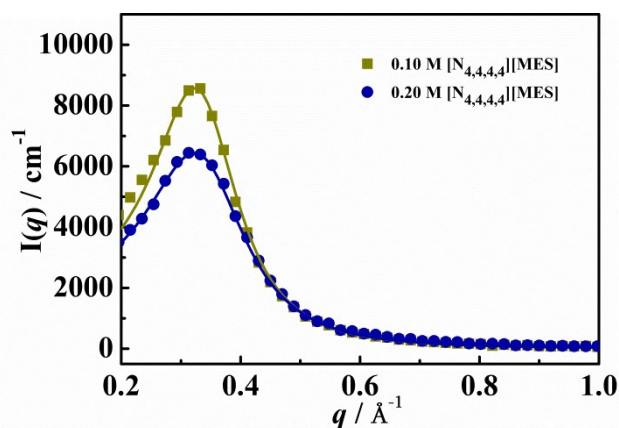

Figure S1. SAXS spectra of  $\text{H}_2\text{O}(0.10/0.20 \text{ M } [\text{N}_{4,4,4,4}][\text{MES}])/\text{SDBS}/n\text{-butanol}/n\text{-octane}$  microemulsion system ( $T = 30 \text{ }^\circ\text{C}$ ,  $\phi = 0.500$ ,  $\beta = 0.140$ ,  $\varepsilon = 0.032$ ).

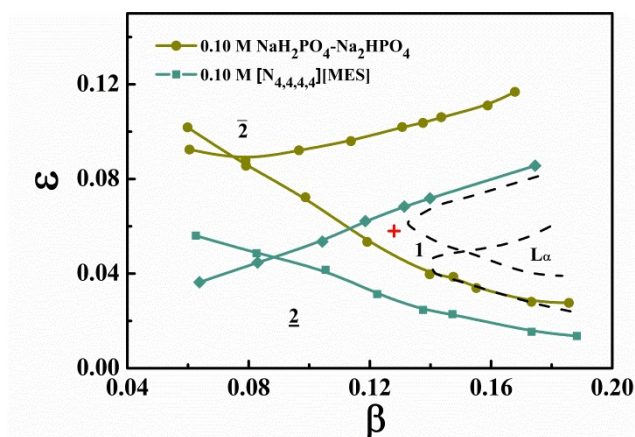

Figure S2. The  $\epsilon$ - $\beta$  fish-like phase diagrams of  $\text{H}_2\text{O}(0.10 \text{ M buffer})/\text{SDBS}/n\text{-butanol}/n\text{-octane}$  microemulsion system at  $\phi = 0.500$  and  $T = 30 \text{ }^\circ\text{C}$ . The symbol “+” locates the sample studied for enzyme stability and medium microstructure.

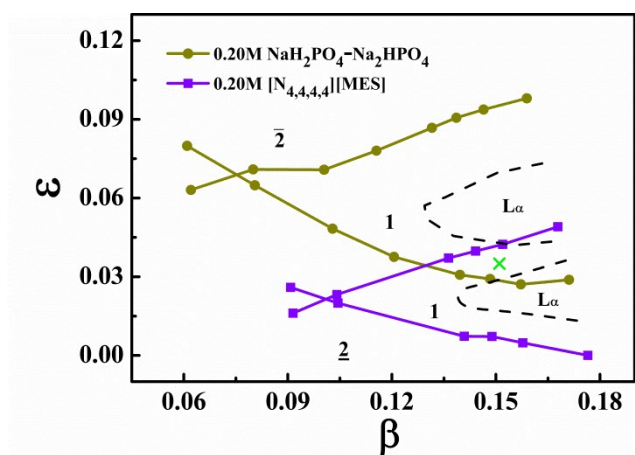

Figure S3. The  $\epsilon$ - $\beta$  fish-like phase diagrams of  $\text{H}_2\text{O}(0.20 \text{ M buffer})/\text{SDBS}/n\text{-butanol}/n\text{-octane}$  microemulsion system at  $\phi = 0.500$  and  $T = 30 \text{ }^\circ\text{C}$ . The symbol “x” locates the sample studied for enzyme stability and medium microstructure.
